# Supplementary material
Source: PubMed Central journal article supplement (PMC2529012)
Supplement: supp_M803749200_Table_S1_final.pdf [file supp_M803749200_Table_S1_final.pdf]

Table S1

|                    | AdMLP                                                                   | <i>URA1</i>      |
|--------------------|-------------------------------------------------------------------------|------------------|
| TBP-DNA            | 17.9 ± 1.8 min                                                          | 70.4 ± 8.3 min   |
| Mot1-TBP-DNA       | Fast phase: 1.8 (-0.5, +0.7) min<br>Slow phase: 92.2 (-12.0, +17.0) min | 181.9 ± 67.2 min |
| Mot1-TBP-DNA + ATP | 0.91 ± 0.09 min                                                         | 0.96 ± 0.1 min   |

Comparison of the rates of dissociation of TBP from the AdMLP (Sprouse et al. EMBO 25:1492 (2006)) and *URA1* promoter (Figure 8, this study) either alone, or in the presence of Mot1 ± ATP.
